# Supplementary material
Source: PubMed Central journal article supplement (PMC4827290)
Supplement: Supp_Fig1.pdf [file Supp_Fig1.pdf]

## Supplementary Data

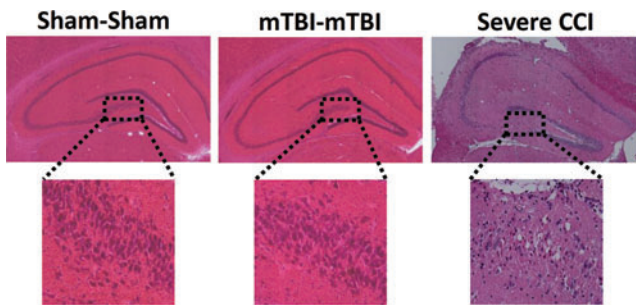

**SUPPLEMENTARY FIG. S1.** Hematoxylin and eosin staining 7 days after second sham insult, second mild traumatic brain injury (mTBI), or severe controlled cortical impact (CCI) in post-natal day 18 rats.
