# Supplementary material
Source: PubMed Central journal article supplement (PMC4827290)
Supplement: Supp_Fig2.pdf [file Supp_Fig2.pdf]

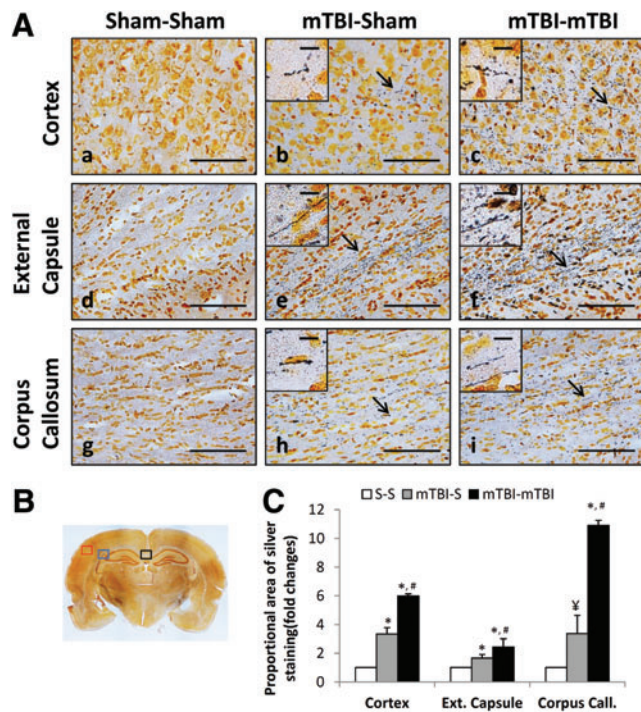

**SUPPLEMENTARY FIG. S2.** Silver staining at 7 days after second sham insult or mild traumatic brain injury (mTBI). Post-natal day (PND) 29 rats were divided into three groups and subjected to (1) two sham insults (S-S), (2) one mTBI, one sham insult (mTBI-S), or (3) two mTBIs (mTBI-mTBI) 24 h apart. **(A)** Representative views of coronal sections (scale bar=100  $\mu$ m) at approximately -3.0 to 4.5 mm, bregma. Insets include higher magnification (scale bar=10  $\mu$ m) image of axonal silver staining indicated by arrows. **(B)** Red (cortex), blue (external capsule), and black (corpus callosum) boxes indicate areas of interest, shown in higher magnification in panels A. **(C)** Proportional area of positive silver staining in PND 29 brains (n=3/group). Mean  $\pm$  standard error of the mean, \* $p$ <0.05 vs. S-S, # $p$ <0.05 vs. mTBI-S.
