# Supplementary material
Source: PubMed Central journal article supplement (PMC4827290)
Supplement: Supp_Fig3.pdf [file Supp_Fig3.pdf]

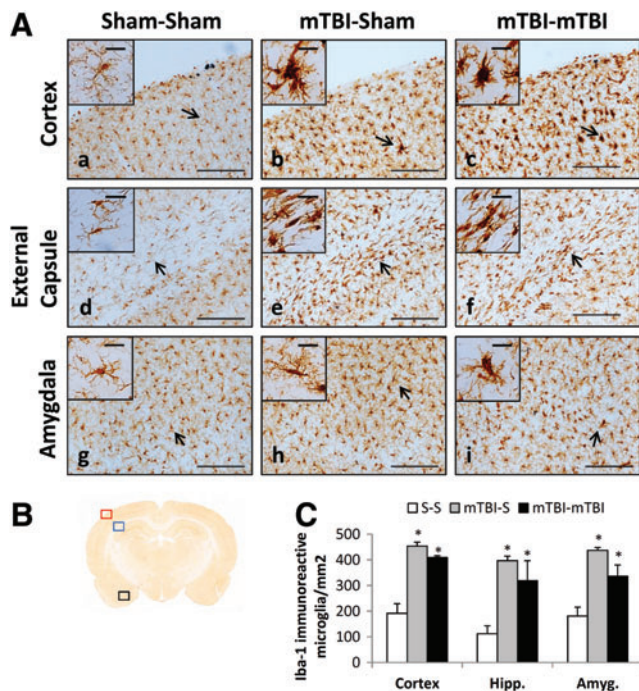

**SUPPLEMENTARY FIG. S3.** Immunohistochemical staining with Iba-1 antibody at 7 days after second sham or mild traumatic brain injury (mTBI). Post-natal day 29 rats were divided into three groups and subjected to (1) two sham insults (S-S), (2) one mTBI, one sham insult (mTBI-S), or (3) two mTBIs (mTBI-mTBI) 24 h apart. **(A)** Representative views of coronal sections (scale bar = 200  $\mu$ m) at approximately -3.0 to 4.5 mm, bregma. Insets include higher magnification (scale bar = 25  $\mu$ m) image of Iba-1 immunoreactive microglia indicated by arrows. **(B)** Red (cortex), blue (external capsule), and black (amygdala) boxes indicate areas of interest, shown in higher magnification in panels A. **(C)** Quantification of the number of Iba-1 immunoreactive cells in rat brains ( $n = 3/\text{group}$ ). Mean  $\pm$  standard error of the mean, \* $p < 0.05$  vs. S-S.
